# Supplementary material for: Estimation of emissions from biomass burning in China (2003–2017) based on MODIS fire radiative energy data
Source: Copernicus journal article supplement (doi:10.5194/bg-2018-468), 2018-12-06
Supplement: Supplementary file 1 [file bg-2018-468-supplement.pdf]

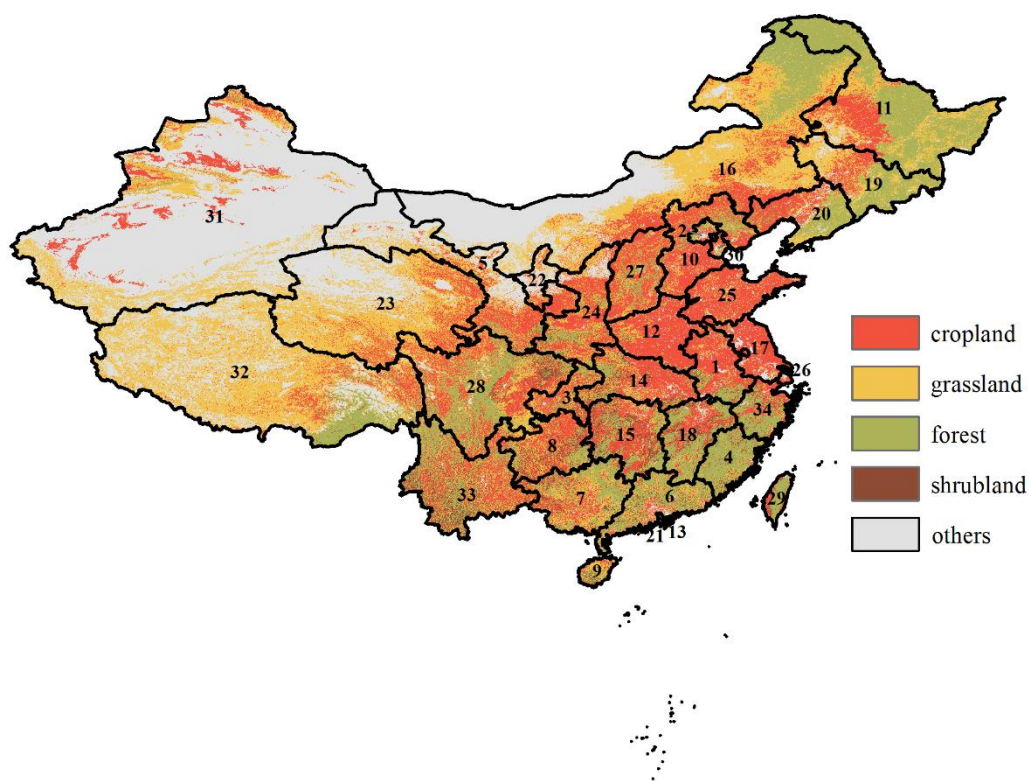

Figure S1. Distribution of major vegetation types in China (GlobCover 2009). Provinces included: (1) Anhui, (2) Beijing, (3) Chongqing, (4) Fujian, (5) Gansu, (6) Guangdong, (7) Guangxi, (8) Guizhou, (9) Hainan, (10) Hebei, (11) Heilongjiang, (12) Henan, (13) Hongkong, (14) Hubei, (15) Hunan, (16) Inner Mongolia, (17) Jiangsu, (18) Jiangxi, (19) Jilin, (20) Liaoning, (21) Macao, (22) Ningxia, (23) Qinghai, (24) Shaanxi, (25) Shandong, (26) Shanghai, (27) Shanxi, (28) Sichuan, (29) Taiwan, (30) Tianjin, (31) Xinjiang, (32) Xizang, (33) Yunnan, (34) Zhejiang.

Table S1. Emission factors of multiple pollutants for each land use type (unit: g·kg<sup>-1</sup>).

| Category  | Land use type                                                               | CO <sub>2</sub> <sup>a</sup> | CO <sup>a</sup> | CH <sub>4</sub> <sup>a</sup> | NMHC <sup>a</sup> | NO <sub>x</sub> <sup>a</sup> | NH <sub>3</sub> <sup>a</sup> | SO <sub>2</sub> <sup>a</sup> | BC <sup>b</sup> | OC <sup>b</sup> | PM <sub>2.5</sub> <sup>a</sup> | PM <sub>10</sub> <sup>a</sup> |
|-----------|-----------------------------------------------------------------------------|------------------------------|-----------------|------------------------------|-------------------|------------------------------|------------------------------|------------------------------|-----------------|-----------------|--------------------------------|-------------------------------|
| cropland  | Post-flooding or irrigated croplands (or aquatic)                           | 1353.5                       | 76.1            | 2.8                          | 9.8               | 2.91                         | 1.4                          | 0.4                          | 0.63            | 2               | 5.04                           | 6.335                         |
| cropland  | Rainfed croplands                                                           | 1353.5                       | 76.1            | 2.8                          | 9.8               | 2.91                         | 1.4                          | 0.4                          | 0.63            | 2               | 5.04                           | 6.335                         |
| cropland  | Mosaic cropland(50-70%) / vegetation (grassland/shrubland/forest) (20-50%)  | 1669.38                      | 84.72           | 3.4                          | 5.83              | 3.5                          | 0.91                         | 0.47                         | 0.52            | 6.275           | 7.92                           | 8.51                          |
| grassland | Mosaic vegetation (grassland/shrubland/forest) (50-70%) / cropland (20-50%) | 1669.38                      | 84.72           | 3.4                          | 5.83              | 3.5                          | 0.91                         | 0.47                         | 0.52            | 6.275           | 7.92                           | 8.51                          |
| forest    | Closed to open (>15%) broadleaved evergreen or semi-deciduous forest (>5m)  | 1710                         | 88.04           | 4.15                         | 13.33             | 1.96                         | 1                            | 0.49                         | 0.82            | 5.65            | 10.15                          | 12.75                         |
| forest    | Closed (>40%) broadleaved deciduous forest (>5m)                            | 1703.17                      | 87.04           | 3.36                         | 10.77             | 2.98                         | 1.03                         | 0.63                         | 0.77            | 7.625           | 12.26                          | 12.75                         |
| forest    | Open (15-40%) broadleaved deciduous forest/woodland (>5m)                   | 1703.17                      | 87.04           | 3.36                         | 10.77             | 2.98                         | 1.03                         | 0.63                         | 0.77            | 7.625           | 12.26                          | 12.75                         |
| forest    | Closed (>40%) needleleaved evergreen forest (>5m)                           | 1700                         | 83.74           | 3.18                         | 10.44             | 3.14                         | 1.15                         | 0.63                         | 0.77            | 7.625           | 12.65                          | 13.05                         |
| forest    | Open (15-40%) needleleaved deciduous or evergreen forest (>5m)              | 1700                         | 83.74           | 3.18                         | 10.44             | 3.14                         | 1.15                         | 0.63                         | 0.77            | 7.625           | 12.65                          | 13.05                         |
| forest    | Closed to open (>15%) mixed broadleaved and needleleaved forest (>5m)       | 1704.39                      | 86.27           | 3.56                         | 11.51             | 2.69                         | 1.06                         | 0.56                         | 0.79            | 6.97            | 11.69                          | 12.9                          |
| forest    | Mosaic forest or shrubland (50-70%) / grassland (20-50%)                    | 1669.38                      | 84.72           | 3.4                          | 5.83              | 3.5                          | 0.91                         | 0.47                         | 0.52            | 6.275           | 7.92                           | 8.51                          |
| grassland | Mosaic grassland(50-70%) / forest or shrubland (20-50%)                     | 1669.38                      | 84.72           | 3.4                          | 5.83              | 3.5                          | 0.91                         | 0.47                         | 0.52            | 6.275           | 7.92                           | 8.51                          |

Table S1. Continued.

|           |                                                                                                                                |         |       |      |      |      |      |      |      |       |      |      |
|-----------|--------------------------------------------------------------------------------------------------------------------------------|---------|-------|------|------|------|------|------|------|-------|------|------|
| shrubland | Closed to open (>15%) (broadleaved or needleleaved, evergreen or deciduous) shrubland (<5m)                                    | 1669.38 | 84.72 | 3.4  | 5.83 | 3.5  | 0.91 | 0.47 | 0.52 | 6.275 | 7.92 | 8.51 |
| grassland | Closed to open (>15%) herbaceous vegetation (grassland, savannas or lichens/mosses)                                            | 1651.07 | 82.06 | 3.37 | 5.94 | 3.77 | 0.87 | 0.48 | 0.5  | 4.84  | 7.11 | 9.19 |
| grassland | Sparse (<15%) vegetation                                                                                                       | 1632.75 | 79.4  | 3.33 | 6.04 | 4.04 | 0.83 | 0.48 | 0.48 | 3.4   | 6.3  | 9.86 |
| forest    | Closed to open (>15%) broadleaved forest regularly flooded (semi-permanently or temporarily) - Fresh or brackish water         | 1765.5  | 94    | 1.5  | 6.8  | 2.1  | 0.6  | 0.8  | 0.52 | 6.275 | 11.2 | 12.5 |
| forest    | Closed (>40%) broadleaved forest or shrubland permanently flooded - Saline or brackish water                                   | 1765.5  | 94    | 1.5  | 6.8  | 2.1  | 0.6  | 0.8  | 0.52 | 6.275 | 11.2 | 12.5 |
| grassland | Closed to open (>15%) grassland or woody vegetation on regularly flooded or waterlogged soil - Fresh, brackish or saline water | 1765.5  | 94    | 1.5  | 6.8  | 2.1  | 0.6  | 0.8  | 0.52 | 6.275 | 11.2 | 12.5 |

Note: Lowercase letters indicate the data source.

Sources are from the following: <sup>a</sup>(Andreae and Merlet, 2001; Streets et al., 2003; Cao et al., 2004; Michel et al., 2005; Wiedinmyer et al., 2006).

<sup>b</sup>(Andreae and Merlet, 2001; Streets et al., 2001; Reddy and Venkataraman, 2002; Cao et al., 2006).

## References

- Andreae, M. O., and Merlet, P.: Emission of trace gases and aerosols from biomass burning, *Global Biogeochemical Cycles*, 15, 955-966, doi:10.1029/2000GB001382, 2001.
- Cao, G., Zheng, F., and Wang, Y.: Inventory of TSP, PM<sub>10</sub>, PM<sub>2.5</sub> emissions from biomass burning in China (in Chinese), *The Chinese Journal of Process Engineering*, 4(Supplement), 700-704, 2004.
- Cao, G., Zhang, X., Zheng, F., and Wang, Y.: Estimating the Quantity of Crop Residues Burnt in Open Field in China (in Chinese), *Resources Science*, 28, 9-13, 2006.
- Michel, C., Lioussé, C., Gregoire, J. M., Tansey, K., Carmichael, G. R., and Woo, J. H.: Biomass burning emission inventory from burnt area data given by the SPOT-VEGETATION system in the frame of TRACE-P and ACE-Asia campaigns, *J Geophys Res-Atmos*, 110, doi:10.1029/2004jd005461, 2005.
- Reddy, M. S., and Venkataraman, C.: Inventory of aerosol and sulphur dioxide emissions from India. Part II - biomass combustion, *Atmos Environ*, 36, 699-712, doi:10.1016/S1352-2310(01)00464-2, 2002.
- Streets, D. G., Gupta, S., Waldhoff, S. T., Wang, M. Q., Bond, T. C., and Yiyun, B.: Black carbon emissions in China, *Atmospheric Environment*, 35, 4281-4296, doi:[https://doi.org/10.1016/S1352-2310\(01\)00179-0](https://doi.org/10.1016/S1352-2310(01)00179-0), 2001.
- Streets, D. G., Yarber, K. F., Woo, J. H., and Carmichael, G. R.: Biomass burning in Asia: Annual and seasonal estimates and atmospheric emissions, *Global Biogeochemical Cycles*, 17, n/a-n/a, doi:10.1029/2003gb002040, 2003.
- Wiedinmyer, C., Quayle, B., Geron, C., Belote, A., McKenzie, D., Zhang, X., O'Neill, S., and Wynne, K. K.: Estimating emissions from fires in North America for air quality modeling, *Atmospheric Environment*, 40, 3419-3432, doi:10.1016/j.atmosenv.2006.02.010, 2006.
